# Supplementary material for: Phenotypic alteration of CD8+ T cells in chronic lymphocytic leukemia is associated with epigenetic reprogramming
Source: PubMed Central journal article supplement (PMC5130028; doi:10.18632/oncotarget.9941), 2016-06-10
Supplement: oncotarget-07-40558-s001.pdf [file oncotarget-07-40558-s001.pdf]

## **Phenotypic alteration of CD8<sup>+</sup> T cells in chronic lymphocytic leukemia is associated with epigenetic reprogramming**

### **Supplementary Materials**

See Supplementary Table S1.
